# Supplementary material
Source: Springer Nature journal article supplement (https://www.springermedizin.de/resource/supplementary/12865_2012_511_MOESM4_ESM.pdf/9428154)

Step 1

Step 2

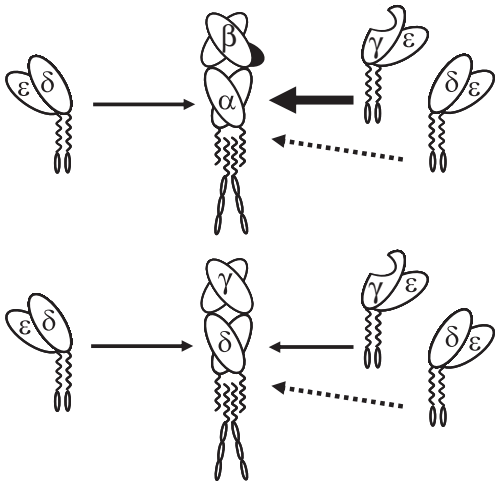

Supplement: MOESM4 [file 9428154]
